# Supplementary material for: Evaluation of Subsurface Drip Irrigation Designs in a Soil Profile with a Capillary Barrier
Source: MDPI journal article supplement (doi:10.3390/w13091300), 2021-05-06
Supplement: s1 [file s1]

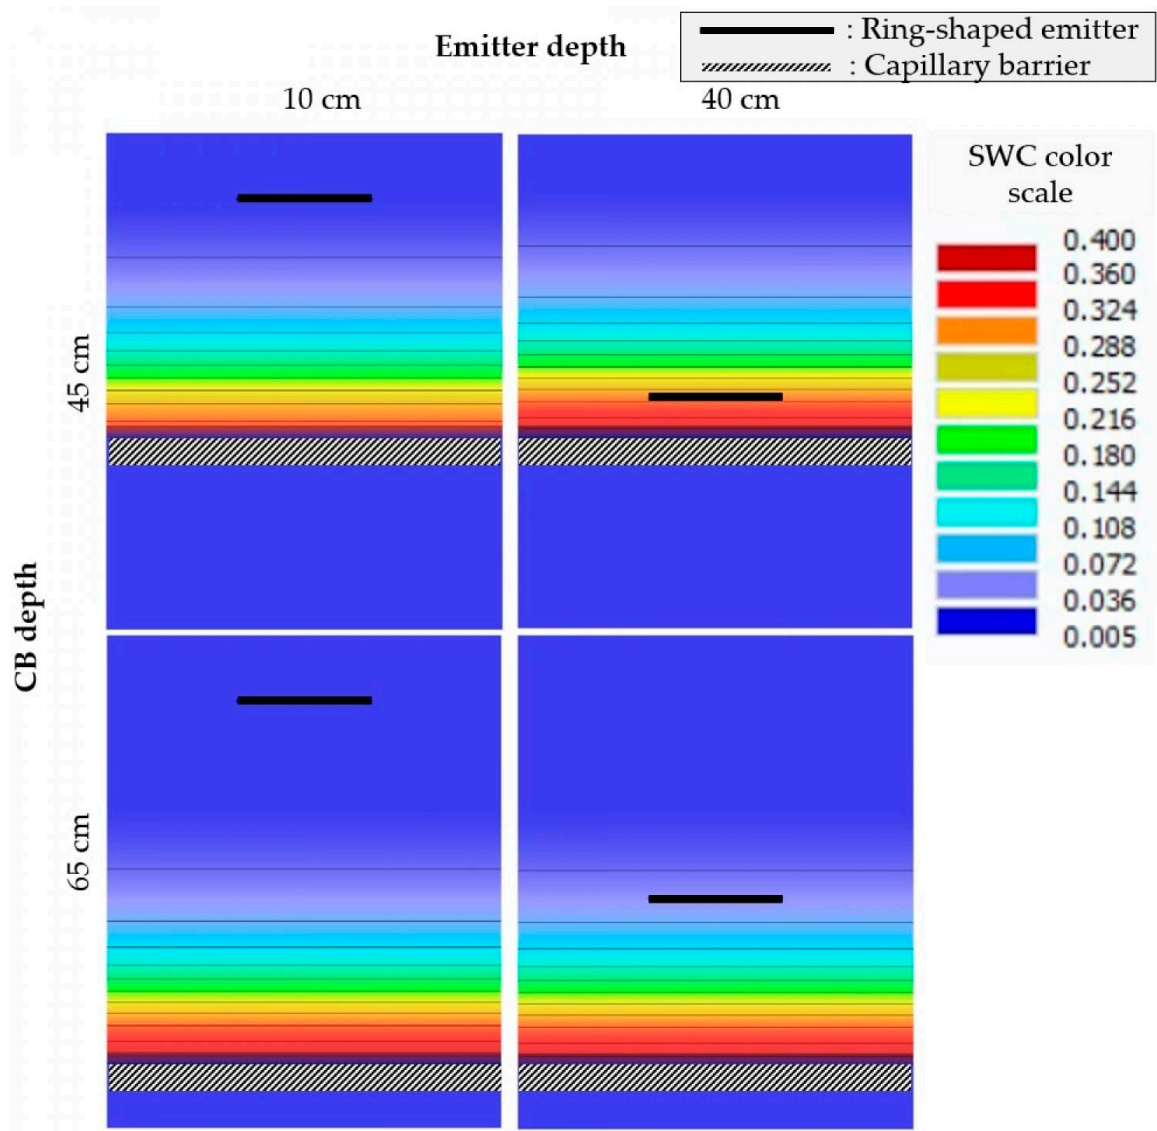

**Figure S1.** Two-dimensional soil water distribution profiles with a CB at a depth of 45 cm and 65 cm and with the ring-shaped emitter at a depth of 10 cm and 40 cm, respectively.
