# Supplementary material for: Evaluation of Subsurface Drip Irrigation Designs in a Soil Profile with a Capillary Barrier
Source: MDPI journal article supplement (doi:10.3390/w13091300), 2021-05-06
Supplement: s1 [file s1]

Archive with 1 entries (1 files):
- water-1192264-supplementary.pdf
